# Supplementary material
Source: ML conference proceedings conference paper supplement (https://openaccess.thecvf.com/content/CVPR_2019/html/Gecer_GANFIT_Generative_Adversarial_CVPR_2019_paper.html)
Supplement: Supplementary file 1 [file Gecer_GANFIT_Generative_Adversarial_CVPR_2019_supplemental.pdf]

# Supplementary Material: GANFIT: Generative Adversarial Network Fitting for High Fidelity 3D Face Reconstruction

Baris Gecer<sup>1,2</sup>, Stylianos Ploumpis<sup>1,2</sup>, Irene Kotsia<sup>3</sup>, and Stefanos Zafeiriou<sup>1,2</sup>

<sup>1</sup>Imperial College London

<sup>2</sup>FaceSoft.io

<sup>3</sup>University of Middlesex

{b.gecer, s.ploumpis, s.zafeiriou}@imperial.ac.uk, drkotsia@gmail.com

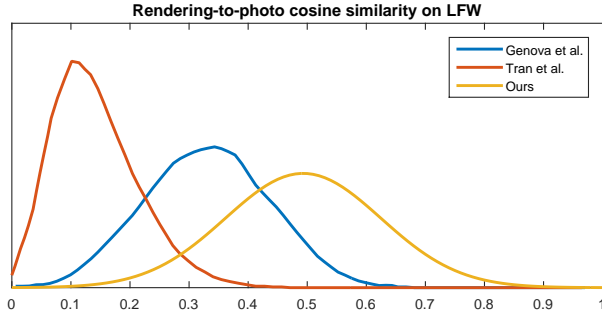

Figure 1: Cosine similarity distributions of rendered and real images LFW based on activations at the embedding layer of VGG-Face network[3]. Our method achieves more than 0.5 similarity on average which [1] has 0.35 average similarity and [6] 0.16 average similarity. Camera and lighting parameters are fixed for all renderings.

## 1. Experiments on LFW

In order to evaluate identity preservation capacity of the proposed method, we run two face recognition experiments on Labelled Faces in the Wild (LFW) dataset [2]. Following [1], we feed real LFW images and rendered images of their 3D reconstruction by our method to a pretrained face recognition network, namely VGG-Face[3]. We then compute the activations at the embedding layer and measure cosine similarity between 1) real and rendered images and 2) renderings of same/different pairs.

In Fig. 1 and 2, we have quantitatively showed that our method is better at identity preservation and photorealism (i.e., as the pretrained network is trained by real images) than other state-of-the-art deep 3D face reconstruction approaches [1, 6].

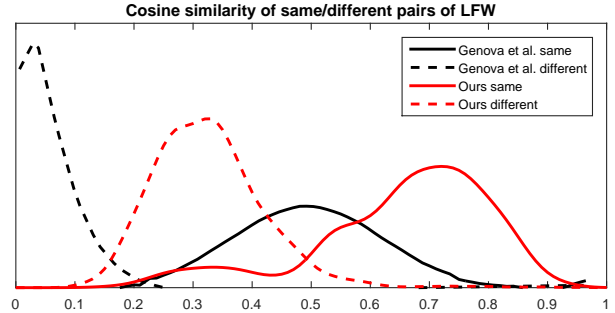

Figure 2: Our method successfully preserve identity so that distribution of cosine similarity of same/different pairs is separable by thresholding. Camera and lighting parameters are fixed for all renderings.

## 2. More Qualitative Results

Figures 3, 4, 5, and 6 illustrate the reconstructions of our method under different settings in comparison to the other state-of-the-art methods. Please see figure captions for detailed explanation.

## References

- [1] Kyle Genova, Forrester Cole, Aaron Maschinot, Aaron Sarna, Daniel Vlasic, and William T Freeman. Unsupervised training for 3d morphable model regression. In *Proceedings of the IEEE Conference on Computer Vision and Pattern Recognition*, pages 8377–8386, 2018. 1, 2
- [2] Gary B. Huang, Marwan Mattar, Honglak Lee, and Erik Learned-Miller. Learning to align from scratch. In *NIPS*, 2012. 1
- [3] O. M. Parkhi, A. Vedaldi, and A. Zisserman. Deep face recognition. In *British Machine Vision Conference*, 2015. 1

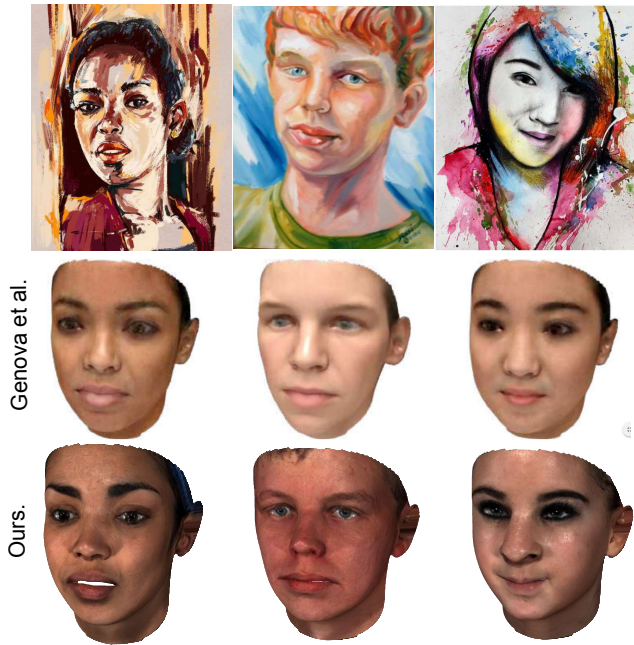

Figure 3: Our results on BAM dataset[7] compared to [1]. Our method is robust to many image deformations and even capable of recovering identities from paintings thanks to strong identity features.

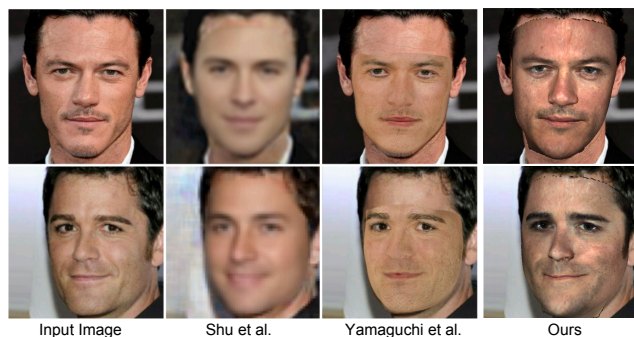

Figure 4: Qualitative comparison with [8, 5] by overlaying the reconstructions on the input images. Our method can generate high fidelity texture with accurate shape, camera and illumination fitting.

- [4] Shunsuke Saito, Lingyu Wei, Liwen Hu, Koki Nagano, and Hao Li. Photorealistic facial texture inference using deep neural networks. In *IEEE Conference on Computer Vision and Pattern Recognition, CVPR*, volume 3, 2017. 3
- [5] Zhixin Shu, Ersin Yumer, Sunil Hadap, Kalyan Sunkavalli, Eli Shechtman, and Dimitris Samaras. Neural face editing with intrinsic image disentangling. In *Computer Vision and Pattern Recognition (CVPR), 2017 IEEE Conference on*, pages 5444–5453. IEEE, 2017. 2

- [6] Anh Tuan Tran, Tal Hassner, Iacopo Masi, and Gérard Medioni. Regressing robust and discriminative 3d morphable models with a very deep neural network. In *Computer Vision and Pattern Recognition (CVPR), 2017 IEEE Conference on*, pages 1493–1502. IEEE, 2017. 1
- [7] Michael J Wilber, Chen Fang, Hailin Jin, Aaron Hertzmann, John Collomosse, and Serge J Belongie. Bam! the behance artistic media dataset for recognition beyond photography. In *ICCV*, pages 1211–1220, 2017. 2
- [8] Shuco Yamaguchi, Shunsuke Saito, Koki Nagano, Yajie Zhao, Weikai Chen, Kyle Olszewski, Shigeo Morishima, and Hao Li. High-fidelity facial reflectance and geometry inference from an unconstrained image. *ACM Transactions on Graphics (TOG)*, 37(4):162, 2018. 2

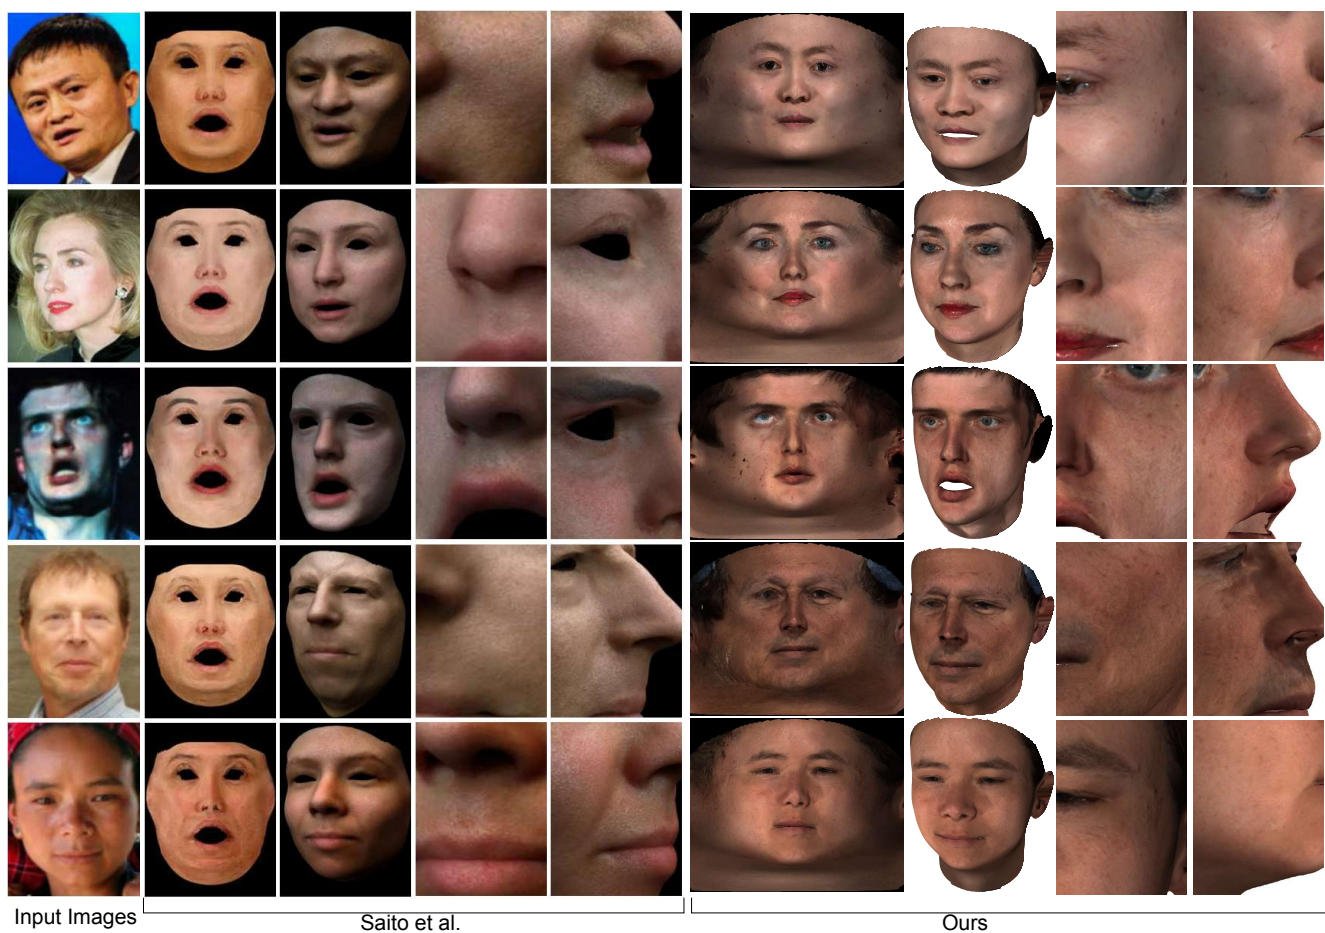

Figure 5: Qualitative comparison with [4] by means of texture maps, whole and partial face renderings. Please note that while our method does not require any particular renderer for special effects, e.g., lighting, [4] produce these renderings with a commercial renderer called Arnold.



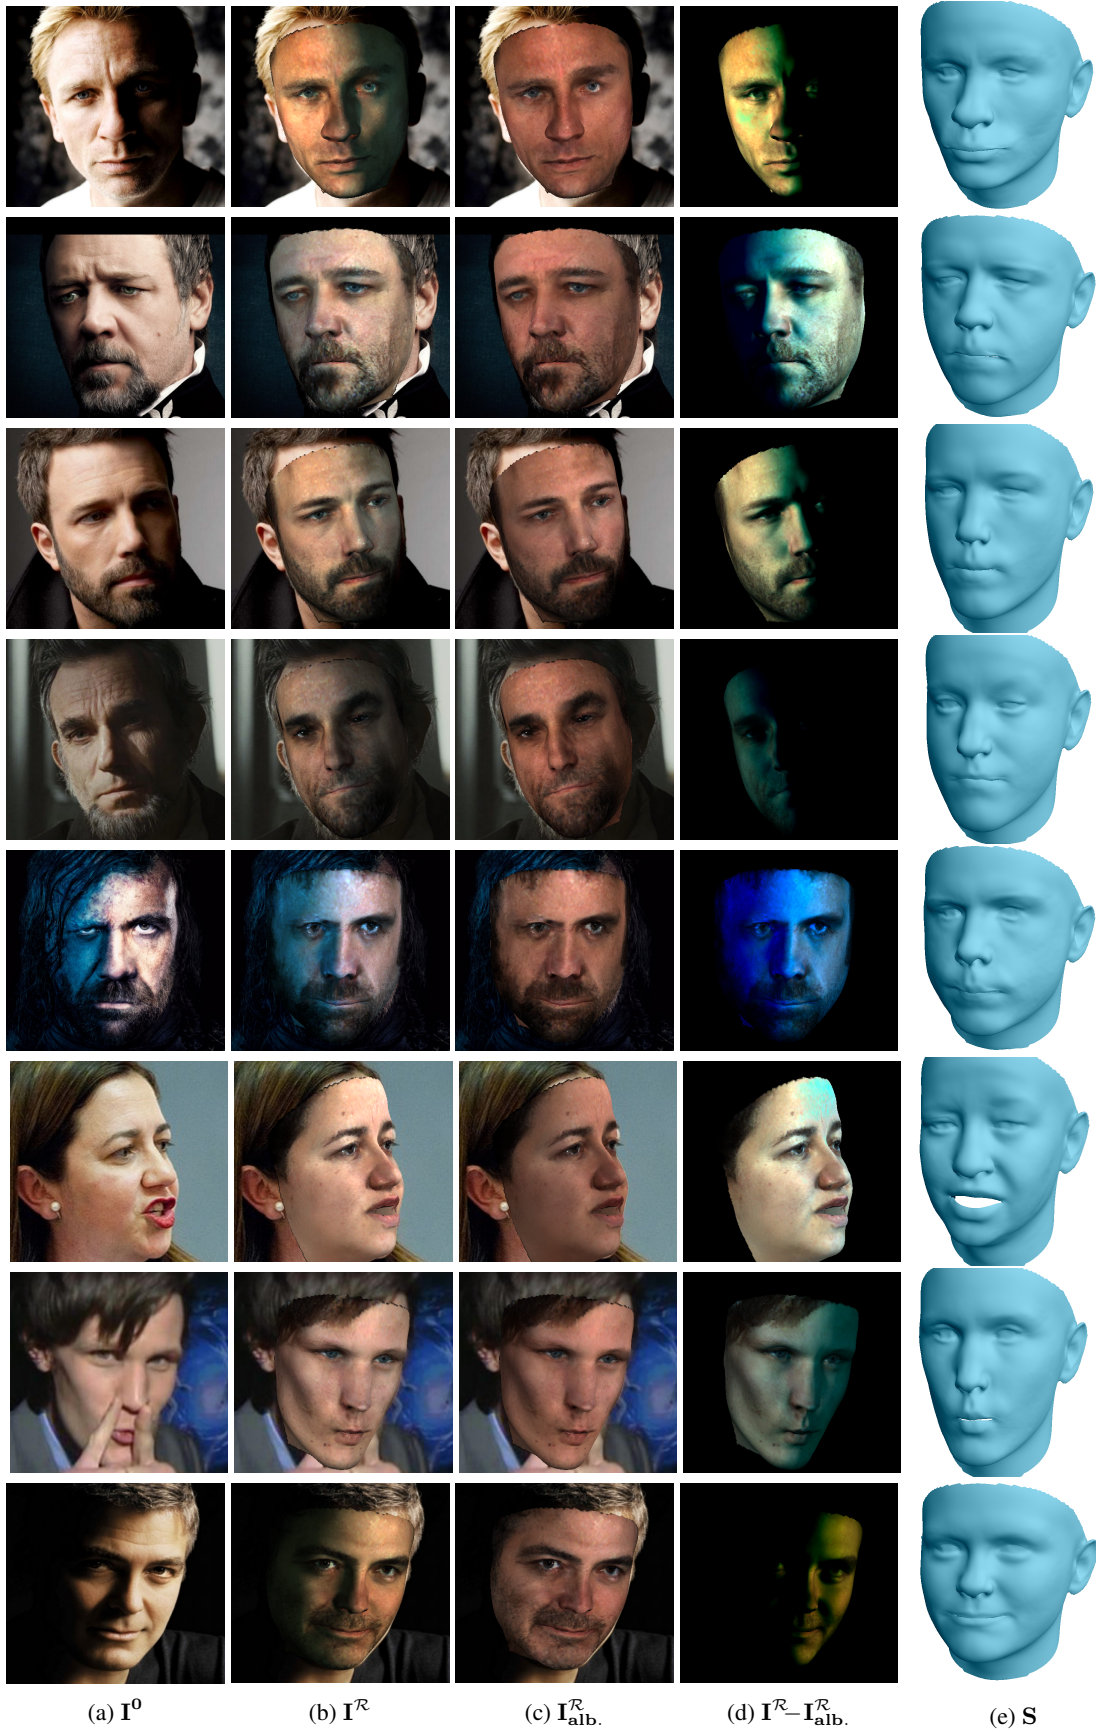

Figure 6: Results under more challenging conditions, *i.e.* strong illuminations, self-occlusions and facial hair. (a) Input image, (b) Estimated fitting overlayed including illumination estimation, (c) Overlayed fitting without illumination, (d) Pixel-wise intensity difference of (b) to (c), (e) Estimated shape mesh
